# Supplementary material for: A python library for computing individual and merged non-CO 2 algorithmic climate change functions: CLIMaCCF V1.0
Source: Copernicus journal article supplement (doi:10.5194/gmd-2022-203), 2022-10-17
Supplement: Supplementary file [file gmd-2022-203-AC1-supplement.pdf]

## Reply to Referee #1 (gmd-2022-203)

We thank referee #1 for the positive and constructive comments on our manuscript. We took all comments of the reviewer into account. Below we (authors comment, AC) reply to the review (review comment, RC) and revised the manuscript accordingly. Additionally, we highlighted the changes of the manuscript, and attached them to the reply.

### Here are our replies:

*RC: "... more background information on the fundamental science of non-CO2 climate forcing could be beneficial here. For example, the less experienced reader may appreciate a more comprehensive explanation of (or references to) chemical reactions that lead to NO<sub>x</sub>-based effects, or the basis of contrail formation and persistence. A clearer explanation of these fundamentals in the beginning of the paper may help to justify decisions made later on regarding parameters used in aCCFs."*

**AC:** Thank you for the feedback. In the introduction we now added some text to explain the NO<sub>x</sub>-based climate effects. Additionally, we provide some references on NO<sub>x</sub>-based effect and contrail formation for the interested reader (i.e. Stevenson et al., 2004; Terrenoire et al. 2022, Kärcher, 2008). Please refer to the track change in the revision.

*RC: "... the discussion around the use of NO<sub>x</sub> EI and flown distance per kg fuel is not immediately obvious, based on wording. It took a good few reads to understand that these metrics were introduced purely to change units for the merged aCCFs. Better explanation around this unit conversion for both NO<sub>x</sub> aCCF and contrail aCCF might help to minimise confusion. See attached pdf for suggestions."*

**AC:** Thank you for this helpful comment and your suggestions. We rephrased parts of this section, thus it should be easier to understand now (see tracked changes).

*RC: "In the discussion on climate efficacy conversions, some more detail on how and why RF from different climate forcers results in different levels of warming could help too."*

**AC:** As described in the text, the relation of constant climate sensitivity parameter fails especially for non-homogenous forcings. E.g., ozone change patterns inferred from precursor emissions of certain transport sectors (aviation, shipping, road traffic) are distinctly non-homogeneous (vertically and horizontally). In contrast to the forcing of the well mixed greenhouse gas CO<sub>2</sub>, these non-homogenous forcings trigger feedbacks, that differ from those induced by CO<sub>2</sub> and thus give a climate response different from CO<sub>2</sub>. We added some more description in the text.

*RC: "A reference/link to the exact ECMWF ERA5 dataset used could aid the reader, should they decide to implement the tool themselves."*

**AC:** We do not give the link in the text, but include in the data availability paragraph the sentence: "ERA5 reanalysis (Hersbach et al., 2020) data are available at the Copernicus Climate Change Service (C3S) Climate Data Store via <https://doi.org/10.24381/cds.bd0915c6>"

*RC: "My research team and I do however, have one major area of concern in the technical implementation of the ozone aCCF: It is stated outright that the photochemical ozone formation does indeed increase with available sunlight. However, ozone aCCF does not take into account irradiance (table 2 states only temperature and geopotential are required to calculate ozone aCCF). How therefore, would these effects be captured in the generated maps? Note, this is less of a point about your findings, and more about drawing attention to*

*the fact that ozone aCCF formulation does not include solar radiation as input. The photolysis reactions pertaining to the formation of ozone are highly sensitive to solar radiation, so more information explaining why the derivation did not identify this sensitivity would be useful.”*

**AC:** Of course, the ozone formation is highly sensitive to solar radiation. These aCCFs were developed by statistical methods relying on correlation to derive algorithms by linking the CCFs, which were explicitly calculated in comprehensive numerical chemistry climate model simulations, to local meteorological conditions (van Manen and Grewe, 2019). The publication of van Manen and Grewe provides a detailed description on how the approximations of the climate effect from NO<sub>x</sub>-induced ozone are generated. Several candidates were selected for these correlations, also including solar incoming radiation. However, comparing the different correlations showed that in case of the ozone aCCF combining temperature and geopotential gives the best correlation (see Table 3 in the publication of van Manen and Grewe 2019 for the quantitative assessment of the correlations). With the geopotential in the ozone aCCF, we assume that this implicitly represents the expected latitudinal dependence. We shortly address this point in Appendix A, describing the aCCF formulations *RC: “One final area that has led to confusion in this paper is the aCCF limitations. Why is it stated that aCCFs are only configured for use in the North Atlantic Flight Corridor region, when all of the maps generated as examples are over mainland Europe? This contradiction between what is stated and what is shown in examples may lead to reader uncertainty.”*

**AC:** The original CCFs, that led to the development of aCCFs, were calculated for the North Atlantic Flight Corridor during typical summer and winter days. This implies that using aCCFs for other locations or seasons should be carefully evaluated. Indeed, we here use the aCCFs over mainland Europe, which isn't included in the North-Atlantic Flight Corridor. However, the European airspace is highly impacted by the North-Atlantic dynamics, that is stretching to Europe. We evaluated the weather patterns over Europe carefully and came to the result that the classification of the weather patterns that was used for the North-Atlantic Flight corridor (classification after Irvine et al. 2013) are also valid for Europe. That's why we are confident, that aCCFs are valid over the European airspace. We now clarify this point in the text (Section 4).

*RC: “...technical details need to be addressed such as punctuation, wording and hyphenation, as there were lots of minor technical issues found in the manuscript..... The attached pdf attempts to address the specific areas that may need a second look, so that corrections can be made where deemed necessary.”*

**AC:** Thank you for the detailed corrections in the manuscript. All technical issues are addressed in the revised version of the manuscript.

# A python library for computing individual and merged non-CO<sub>2</sub> algorithmic climate change functions: CLIMaCCF V1.0

Simone Dietmüller<sup>1</sup>, Sigrun Matthes<sup>1</sup>, Katrin Dahlmann<sup>1</sup>, Hiroshi Yamashita<sup>1</sup>, Abolfazl Simorgh<sup>2</sup>, Manuel Soler<sup>2</sup>, Florian Linke<sup>3,4</sup>, Benjamin Lührs<sup>3</sup>, Maximilian M. Meuser<sup>3,4</sup>, Christian Weder<sup>3</sup>, Volker Grewe<sup>5,1</sup>, Feijia Yin<sup>5</sup>, and Federica Castino<sup>5</sup>

<sup>1</sup>Deutsches Zentrum für Luft und Raumfahrt, Institut für Physik der Atmosphäre, Oberpfaffenhofen, Germany

<sup>2</sup>Department of Aerospace Engineering, Universidad Carlos III de Madrid, Spain

<sup>3</sup>Deutsches Zentrum für Luft und Raumfahrt, Air Space Transportation Systems, Hamburg, Germany

<sup>4</sup>Hamburg University of Technology (TUHH), Hamburg, Germany

<sup>5</sup>Faculty of Aerospace Engineering, Delft University of Technology, Delft, the Netherlands

**Correspondence:** S. Dietmüller (simone.dietmueller@dlr.de)

**Abstract.** Aviation aims to reduce its climate ~~impact-effect~~ by adopting trajectories, that avoid those regions of the atmosphere where aviation emissions have a large impact. To that end, prototype algorithmic climate change functions (aCCFs) can be used, which provide spatially and temporally resolved information on aviation's climate ~~impact-effect~~ in terms of future near-surface temperature change. These aCCFs can be calculated with meteorological input data obtained from e.g. numerical weather prediction models. We here present the open-source Python Library called CLIMaCCF, an easy to use and flexible tool which efficiently calculates both the individual aCCFs (i.e., ~~aCCF of~~ water vapour, nitrogen oxide (NO<sub>x</sub>) induced ozone ~~and methane, and production and methane depletion, and of~~ contrail-cirrus aCCFs) and the merged non-CO<sub>2</sub> aCCFs that combine all these individual contributions. ~~These merged aCCFs can be only constructed with the~~ To construct merged aCCFs all individual aCCFs are converted to the same physical unit. This unit conversion needs the technical specification of aircraft/engine parameters, i.e., NO<sub>x</sub> emission indices and flown distance per kg burnt fuel. These aircraft/engine specific values are provided within CLIMaCCF version V1.0 for a set of aggregated aircraft/engine classes (i.e. regional, single-aisle, wide-body). Moreover, CLIMaCCF allows ~~by a user-friendly configuration setting to choose between a set of different~~ the user to choose from a range of physical climate metrics (i.e. average temperature response for pulse or future scenario emissions over the time horizons of 20, 50 or 100 years). Finally, we demonstrate the abilities of CLIMaCCF ~~by through~~ a series of example applications.

## 1 Introduction

Global aviation significantly contributes to the anthropogenic climate change by CO<sub>2</sub> and non-CO<sub>2</sub> emissions. ~~Non-CO<sub>2</sub> emissions also affect the climate system by changing the concentrations of ozone, water vapour, methane and aerosols as well as cloudiness by forming~~ have a direct effect on climate. Aircraft NO<sub>x</sub> emissions are not radiatively active themselves, but they are very effective in the photo-chemical production of ozone (O<sub>3</sub>) causing a positive radiative forcing. At the same time increased NO<sub>x</sub> and O<sub>3</sub> concentrations lead to an increased oxidation of methane (CH<sub>4</sub>) causing a negative

radiative forcing (e.g. ??). This destruction of methane leads to a subsequent reduction in the ozone productivity, which reduces background ozone concentrations (PMO, primary mode ozone, (e.g. ?)), also causing a negative forcing. Furthermore, induced by non-CO<sub>2</sub> emissions, contrails and contrail-cirrus ~~As can form in ice supersaturated regions and alter the radiation budget~~ (e.g. ?). Overall, as recently reviewed by ?, global aviation contributes to 3.5% of the total anthropogenic radiative forcing (RF). The total aviation RF comprises about ~~one-one-~~ third CO<sub>2</sub> effects and about ~~two-thirds-two-thirds~~ non-CO<sub>2</sub> effects. The largest single contribution to aviation RF comes from contrails and contrail-cirrus, but this estimate is affected by a very large uncertainty, as well as for NO<sub>x</sub> ~~impacts-effects~~ (?). In contrast to the CO<sub>2</sub> ~~impacteffect~~, the non-CO<sub>2</sub> ~~impacts-effects~~ reveal a strong dependence on atmospheric conditions. Thus, the non-CO<sub>2</sub> ~~impacts-effects~~ depend on the geographical location, altitude and time of aircraft emission (e.g. ??). In order to provide information on ~~this-the~~ spatially and temporally resolved climate ~~impact-effect~~ of these non-CO<sub>2</sub> effects, climate change functions (CCFs) were developed with an atmospheric chemistry climate model system (?). These CCFs provide a measure of the spatial and temporal climate ~~impact-effect~~ for a given emission by using the metric of average temperature response (ATR). These CCFs were calculated for a wide range of time steps and for eight representative weather types in summer and winter classified after ? over the North Atlantic region (?).

Based on these CCFs, ? investigated the transatlantic air traffic for one single winter day and analysed the routing changes that are required to achieve a reduction in the ~~impact-effect~~ of air traffic on climate. Thus, this study provides a first comprehensive and valuable basis for weather-dependent flight trajectory optimization with ~~minimum-climate-impact~~ ~~respect to minimum climate effect~~. However, as the calculation of these CCFs within a global ~~chemistry-climate-chemistry-climate~~ model system requires large computational cost, it cannot be used for operational ~~climate-optimized-climate-optimized~~ flight planning. To address this issue, the initial concept of CCFs was extended to algorithmic climate change functions (aCCFs). These functions provide a very fast computation of the individual non-CO<sub>2</sub> climate ~~impact-effect~~ as they are based on mathematical formulas which only need a fairly limited number of relevant local meteorological parameters as input (e.g. ???). To derive the mathematical formulation of the individual aCCFs (a detailed formulation of these prototype aCCFs is given in Appendix A), statistical methods were used. A detailed explanation of the concept of ~~aCCFs-the aCCF~~ approach can be found in ? for the NO<sub>x</sub> ~~induced-emission induced effect on the~~ species ozone and methane (~~as NO<sub>x</sub> acts as a precursor to ozone production and methane depletion~~), and for water vapour. In the case of the contrail aCCFs approach, a detailed description is available in the supplement of ?. These aCCFs formulas ~~facilitate-predicting-the-climate-impact-facilitates~~ ~~the prediction of the climate effect~~ of individual species by means of meteorological input data from e.g., weather forecast, without computationally extensive re-calculation using chemistry-climate models. Of course, a number of assumptions and simplifications are necessary for this kind of ~~statistical~~ approach. Nevertheless, it was shown in the studies of ? and ? that these prototype aCCFs are in broad agreement with the climate change metric of earlier studies, i.e. CCFs (?).

Indeed, aCCFs can be used for trajectory planning purposes. The weather dependent re-routing of flight trajectories in order to reduce the climate ~~impact-effect~~ of air traffic needs the information on regions that are highly sensitive to aviation emissions. In order to quantify the potential of mitigating aviation's climate ~~impacteffect~~, case studies with optimized aircraft trajectories that use the above described aCCFs, were performed. These studies showed that re-routing has a large potential to reduce the air traffic's contribution to climate change. Even small changes in the flight trajectory can lead to significant reduction of the

climate ~~impact-effect~~ (see e.g. ~~?????~~).

Nevertheless, a ~~climate-optimal-climate-optimal~~ trajectory (interested readers are also referred to ? for a recent, thorough survey on ~~climate-optimal-climate-optimal~~ aircraft trajectory planning) requires a quantitative estimate of ~~the-total-CO<sub>2</sub> and~~ non-CO<sub>2</sub> climate ~~impact-effects~~. ~~The latter is needed~~ as four dimensional data set (latitude, longitude, altitude, time). This location and time dependent quantitative estimate can be generated by combining the individual aCCFs of water vapour, NO<sub>x</sub> ~~induced ozone-and-methane-changes-induced ozone (production), NO<sub>x</sub>-induced methane (depletion)~~, and contrail-cirrus to a merged non-CO<sub>2</sub> aCCF by means of a consistent climate metric. However, for combining the individual aCCFs, it has to be considered that the aCCF algorithms provide their estimates in average temperature change per emitted mass of the relevant species, e.g. in 65 K/kg(NO<sub>2</sub>) for the ozone aCCF. Thus, before merging the individual aCCFs, all individual aCCFs have to be converted to the unit of K/kg(fuel). For this conversion the information on NO<sub>x</sub> emission indices and flown distance per kg burnt fuel (specific range) is needed. Based on these generated merged non-CO<sub>2</sub> aCCFs ~~climate-optimized-climate-optimized~~ trajectories that aim to avoid climate sensitive regions can be calculated efficiently. Note, that also the total merged aCCF (non-CO<sub>2</sub> as well as CO<sub>2</sub> effects included) can be calculated, however as the CO<sub>2</sub> aCCF is a constant in location and time, we focus on the merged 70 non-CO<sub>2</sub> aCCFs.

The development of the Python Library, CLIMaCCF, which will be released together with this paper (available on Zenodo with the software DOI: 10.5281/zenodo.6977272) represents a technical enabler to seamlessly integrate the information of spatially and temporally dependent non-CO<sub>2</sub> climate ~~impacts-effects~~ (in terms of individual and also merged non-CO<sub>2</sub> aCCFs) in a trajectory optimization tool. In this paper we will present both the scientific background of merging aCCFs and the technical 75 framework of the user friendly and flexible Python Library CLIMaCCF V1.0.

The paper is structured as follows. In Section ?? ~~the scientific background of generating merged aCCFs, which quantify the spatial and temporal non-CO<sub>2</sub> climate impact of aviation, is described. Merged non-CO<sub>2</sub> aCCFs rely on the individual prototype algorithmic climate change functions. Before combining these individual aCCFs we explain how individual aCCFs are combined~~ to a merged ~~aCCF, non-Co<sub>2</sub>, by taking~~ assumptions about emission indices of NO<sub>x</sub> and flown distance per kg burnt fuel. ~~We also provide a detailed overview on the scientific climate background needed to understand which decisions have to be made and decisions on the physical climate metric used and the inclusion or exclusion of the forcing dependent efficacy (e.g. ?) have to be taken before generating the merged aCCF. This includes insights to physical climate metrics and forcing dependent efficacies.~~ In Section ?? the technical implementation (general architecture) of the Python Library CLIMaCCF is 85 given by describing how the user can generate individual and merged aCCFs in a flexible manner. Section ?? provides various analyses of the individual aCCFs and the merged aCCF, showing their characteristic patterns. Moreover, the sensitivity of merged aCCFs to different assumptions, as well as ~~the identification of climate highly sensitive regions-identifying regions of high climate sensitivity in the presence of aircraft emissions~~ is given. A discussion about the capability and the limitations of the Python Library follows (Section ??), before the conclusions are drawn in Section ??.

90 <https://www.overleaf.com/project/61a5096009dda89183f852ac>

## 2 Generation of merged aCCFs

Based on aCCFs that represent the individual effects of water vapour, ~~NO<sub>x</sub> induced ozone and methane changes~~ induced ozone increase, NO<sub>x</sub> -induced methane decrease and contrail-cirrus, a single aCCF function which combines these individual CO<sub>2</sub> and non-CO<sub>2</sub> ~~impacts effects~~ can be generated (i.e. merged aCCF). This merged aCCF can be used as advanced meteorological (MET) information for flight planning, as a climate-optimized trajectory requires the quantification of the total climate ~~impact effect~~ as four-dimensional data set (latitude, longitude, altitude and time). Such a merged aCCF can only be constructed by using assumptions on several aircraft/engine specific parameters and consistent climate metrics. In the following, we describe the concept of merging aCCFs and the underlying assumptions (choice of aircraft/engine parameters, climate metric and efficacy) in detail.

### 2.1 Mathematical formulation of individual aCCFs

As mentioned in the introduction, aCCFs were developed to provide a computational fast way to calculate the climate ~~impact effect~~ of individual non-CO<sub>2</sub> aviation emissions in dependence of their geographical location, altitude, time and weather. Correlations and statistical methods were used to derive the individual prototype aCCFs of water vapour, ~~NO<sub>x</sub> induced ozone~~ induced ozone (production), ~~NO<sub>x</sub> induced methane~~ induced methane (destruction) and contrail-cirrus. For water vapour, ozone and methane aCCFs, this was done by linking a large range of climate change function (CCF) data, which were calculated in a detailed chemistry climate model simulation (?), to selected meteorological data, as e.g., temperature or geopotential height (?). The algorithm for contrail aCCFs was developed differently. Contrail aCCFs are obtained from contrail radiative forcing calculations which are based on ~~ERA-Interim reanalysis data (?) and on~~ European Centre for Medium-Range Weather Forecasts (ECMWF) reanalysis and contrail trajectory data (?). A short overview of the mathematical formulation of these emission type dependent prototype aCCFs is given in Appendix A of this document. For a detailed description of the first complete and consistent set of prototype aCCFs (aCCF-V1.0) the reader is referred to ?. Moreover, within the EU project FlyATM4E an updated set of aCCFs (aCCF-V1.1) was developed that considers current level of scientific understanding of aviation's climate effects: For more details, readers are referred to ~~??~~ ??. Overall for the development of the aCCF a number of assumptions and simplifications were necessary ~~-, e.g. in the statistical approach or in the calculation of the CCF data in a climate chemistry model~~. Nevertheless, it was shown that these aCCFs are in broad agreement with the climate change metric of earlier studies (e.g. ??).

### 2.2 Merged non-CO<sub>2</sub> aCCFs and total aCCFs

To build the merged non-CO<sub>2</sub> aCCFs, all individual aCCFs are converted consistently to the same physical units of [K/kg(fuel)]. ~~Note that the~~ In order to be independent of the aircraft type the individual aCCFs (except the water vapour aCCF) are given in ~~different specific~~ units, i.e., K/km for contrail aCCFs or K/kg(NO<sub>2</sub>) for the ~~NO<sub>x</sub> induced~~ induced ozone and methane aCCF. ~~These differences result in different weighting of the effect for different aircraft/engine classifications. To this end, we select for~~ By simply multiplying the NO<sub>x</sub> induced aCCFs (aCCF<sub>O3</sub>, aCCF<sub>CH4</sub> and aCCF<sub>PMO</sub>) by the NO<sub>x</sub> emission indices (EI<sub>NO<sub>x</sub></sub>

in  $\text{g}(\text{NO}_2)/\text{kg}(\text{fuel})$ ) and ~~for contrail-cirrus specific range or the contrail-cirrus aCCF ( $a\text{CCF}_{\text{contrail}}$ )~~ by flown distance per kg burnt fuel ( $F_{km}$  in  $[\text{km}/\text{kg}(\text{fuel})]$ ) ~~all individual aCCF are converted to same unit ( $\text{K}/\text{kg}(\text{fuel})$ ) and in a second step the~~  
125 ~~converted individual aCCF are combined to a merged aCCF (see Eq. 1).~~ Note that the water vapour aCCF formula is already fuel related and, thus, does not need to be multiplied by the emission index of water vapour. Typical transatlantic fleet mean values of  $EI_{\text{NO}_x}$  and of  $F_{km}$  are available from the literature: transatlantic fleet mean values for  $F_{km}$  is  $0.16 \text{ km}/\text{kg}(\text{fuel})$  (? and personal communication F. Linke, TU Hamburg, 2020) and for  $EI_{\text{NO}_x}$  is  $13 \text{ g}(\text{NO}_2)/\text{kg}(\text{fuel})$  (e.g. ?), respectively. Another possibility is to take specific emitted amounts of  $\text{NO}_x$  emissions and fuel consumption values from an engine performance  
130 model. ~~Here, we use altitude depending~~ In this study we also provide altitude dependent mean emission indices for  $\text{NO}_x$  and flown distance per kg burnt fuel for aggregated aircraft/engine classifications (e.g. regional, single-aisle and wide-body, see Section 2.3) and combine that with the choice of climate metric (Section 2.4) and the use of forcing efficacies (Section 2.5) to merge non- $\text{CO}_2$  aCCFs:

$$\begin{aligned}
a\text{CCF}_{\text{merged}}^{\text{non-}\text{CO}_2}(t, x, y, z, i_{ac}, i_r, i_{CM}) = & \quad (1) \\
135 \quad & a\text{CCF}_{\text{O}_3}(t, x, y, z) * EI_{\text{NO}_x}(i_{ac}, z) * r_{\text{O}_3}(i_r) * \text{CM}_{\text{O}_3}(i_{CM}) \\
& + a\text{CCF}_{\text{CH}_4}(t, x, y, z) * EI_{\text{NO}_x}(i_{ac}, z) * r_{\text{CH}_4}(i_r) * \text{CM}_{\text{CH}_4}(i_{CM}) \\
& + a\text{CCF}_{\text{PMO}}(t, x, y, z) * EI_{\text{NO}_x}(i_{ac}, z) * r_{\text{PMO}}(i_r) * \text{CM}_{\text{PMO}}(i_{CM}) \\
& + a\text{CCF}_{\text{contrail}}(t, x, y, z) * F_{km}(i_{ac}, z) * r_{\text{contrail}}(i_r) * \text{CM}_{\text{contrail}}(i_{CM}) \\
& + a\text{CCF}_{\text{H}_2\text{O}}(t, x, y, z) * r_{\text{H}_2\text{O}}(i_r) * \text{CM}_{\text{H}_2\text{O}}(i_{CM}),
\end{aligned}$$

140 where  $a\text{CCF}_X$  are the algorithmic climate change functions for ~~a specie~~ species  $X$  i.e., water vapour ( $\text{H}_2\text{O}$ ), ozone ( $\text{O}_3$ ), methane ( $\text{CH}_4$ ), primary mode ozone (PMO), and contrail-cirrus. The variables  $t, x, y, z$  indicate the three spatial variables ( $x, y, z$ ) and time ( $t$ ).  $i_{ac}$  is the identifier for three mean aircraft/engine classes: regional, single-aisle, wide-body (see Section ??).  $r_X(i_r)$  is the efficacy (see Section ??) of the species  $X$  with the switch  $i_r \in \{0, 1\}$  for disregarding or using the efficacies (i.e.  $r_X(0)=1$ ) and  $\text{CM}_X(i_{CM})$  is the climate metric conversion factor (see Section ??) for species  $X$  and the choice  
145 of currently four climate metrics  $i_{CM} \in \{0, 1, 2, 3\}$ .

By additionally including the aviation climate impact effect of  $\text{CO}_2$  the total merged aCCF is given:

$$\begin{aligned}
a\text{CCF}_{\text{merged}}^{\text{total}}(t, x, y, z, i_{ac}, i_r, i_{CM}) = & \quad (2) \\
= & a\text{CCF}_{\text{CO}_2} * \text{CM}_{\text{CO}_2}(i_{CM}) + a\text{CCF}_{\text{merged}}^{\text{non-}\text{CO}_2}(t, x, y, z, i_{ac}, i_r, i_{CM})
\end{aligned}$$

Note that the  $\text{CO}_2$  aCCF is independent of the location  $x, y, z$ , efficacy ( $r_X$ ) and aircraft class.

150 For a merged aCCF it is required that the individual aCCFs are based on the same physical climate metric, emission scenario and time horizon. The recent publication of ? comprises such a consistent set of individual updated prototype aCCFs. Note, that earlier publications (as e.g. ?) provided mathematical formulations that assumed different emission scenarios for water vapour and  $\text{NO}_x$  aCCFs and for contrail aCCFs, as they were developed separately.

Overall, merged aCCFs are not only a function of time and location, but also a function of aircraft/engine specific data, climate  
155 metric and efficacy. For an efficient and flexible provision of such merged aCCFs we developed the Python Library CLIMaCCF.

### 2.3 Choice of aircraft/engine specific parameters

The calculation of merged non-CO<sub>2</sub> aCCFs requires knowledge about the emission index of  $NO_x$ ,  $EI_{NO_x}$ , and the flown distance per kg burnt fuel,  $F_{km}$  (see Eq. 1). As these indices vary depending on the actual aircraft-engine combination ( $i_{ac}$ ) and the cruise altitude ( $z$ ), the use of global mean emission indices should be avoided. Moreover, there is a strong altitude dependency of the  $NO_x$  emission index and flown distance  $F_{km}$ , which should be considered as well. Aggregated values for [altitude dependent](#) emission indices are derived from trajectory simulation and emission inventory data. Similarly, aggregated values for the specific range (i.e. flown distance per kg burnt fuel)  $F_{km}$ , are gained.

For instance, analyzing the ten most frequented routes in the North Atlantic Flight Corridor with the ten most used aircraft types in 2012 yields an average flown distance per kg burnt fuel of 0.16 km/kg(fuel) (personal communication F. Linke, 2020) for transatlantic flights. More differentiated values are obtained by analyzing available emission inventory data from the DLR project “Transport and Climate” (TraK). This data contains the air traffic emission distribution in year 2015 and can be evaluated separately per aircraft type, altitude or region. Basis for the development of these emission inventories was a database of reduced emission profiles within the Global Air Traffic Emission Distribution Laboratory (GRIDLAB, ?). Those profiles were created by simulating aircraft trajectories for various ranges and load conditions with aircraft performance models from EUROCONTROL’s Base of Aircraft Data (BADA, ?) model families 3 and 4. Along those trajectories engine emissions were calculated using the EUROCONTROL-modified Boeing Fuel Flow method 2 (??) applied to engine certification data for the Landing and Take-off Cycle (LTO) taken from the International Civil Aviation Organization (ICAO) Engine emission database. In order to create the reduced profiles, those trajectory emission data were finally resampled to only consider key points along the profile such as transitions between flight phases. The emission inventory contains gridded data in a resolution of  $0.25^\circ \times 0.25^\circ \times 1000$  ft (Weder et al., 2022, under preparation). Associated to each grid cell are the amounts of the individual emission species as well as the flown distance in that grid cell. The aggregated mean  $EI_{NO_x}$  value at a given altitude is calculated by dividing the sum of the amounts of emissions per species in all grid cells at that altitude by the sum of burnt fuel at that altitude. The specific range is calculated accordingly. We evaluated aggregated fleet-level values for  $EI_{NO_x}(i_{ac}, z)$  and the specific range  $F_{km}(i_{ac}, z)$  for a variety of aircraft/engine classes. As the aircraft specific values are similar for certain aircraft/engine class, we group those aircraft classes and provide their average fleet values [and their standard deviation](#) in Tables ?? and ?. Three different aircraft types are given: regional (small aircraft with short range (up to 100 seats)), single-aisle (short to medium-range narrow-body aircraft) ~~;~~ [and](#) wide-body (medium to long-range aircraft (250-600 seats)) .

Table ?? clearly shows that average  $EI_{NO_x}$  values increase with increasing aircraft class/size, while  $EI_{NO_x}$  values decrease with increasing altitude.  $NO_x$  emissions are produced during combustion due to high combustion temperatures, which are connected to high thrust settings and engine load conditions. In general, the thrust requirement increases with the aircraft size. Increasing the thrust requirement leads to an increase in the combustion temperature, therefore, an increase in  $NO_x$  emissions. Below cruise altitude the aircraft is e.g. during climb operated with climb thrust and during descent with near idle conditions



**Table 1.** Average specific NO<sub>x</sub> emission indices and their standard deviation (in g(NO<sub>2</sub>)/kg(fuel)) for the three aircraft classes (regional, single-aisle, wide-body) derived from the global TraK emission inventory.  $EI_{NO_x}(i_{ac}, z)$  are shown for various typical flight altitudes (20000 ft - 40000 ft). Besides the flight altitude in ft the corresponding pressure level under ICAO standard atmosphere is given in hPa.

| flight altitude [ft] | pressure level [hPa] | regional [g(NO <sub>2</sub> )/kg(fuel)] | single-aisle [g(NO <sub>2</sub> )/kg(fuel)] | wide-body [g(NO <sub>2</sub> )/kg(fuel)] |
|----------------------|----------------------|-----------------------------------------|---------------------------------------------|------------------------------------------|
| 20000                | 466                  | <del>11.628</del> 11.464±1.270          | <del>17.279</del> 17.242±1.008              | <del>24.750</del> 24.765±0.928           |
| 25000                | 376                  | <del>10.223</del> 10.168±1.144          | <del>14.877</del> 14.765±0.859              | <del>22.182</del> 22.229±0.835           |
| 30000                | 301                  | 9.377±1.026                             | <del>13.603</del> 13.602±0.792              | <del>19.158</del> 19.230±0.743           |
| 35000                | 238                  | 7.968±0.827                             | <del>11.249</del> 11.248±0.686              | <del>15.008</del> 15.423±0.579           |
| 40000                | 188                  | 6.567±0.795                             | <del>8.564</del> 8.563±0.642                | 12.730±0.434                             |

**Table 2.** Average flown distance per burnt fuel and their standard deviation (in km/kg(fuel)) for the three aircraft classes (regional, single-aisle, wide-body) derived from the global TraK emission inventory.  $F_{km}(i_{ac}, z)$  values are shown in dependence of typical flight altitude (20000 ft - 40000 ft). Besides the flight altitude in ft the corresponding pressure level under ICAO standard atmosphere is given in hPa.

| flight altitude [ft] | pressure level [hPa] | regional [km/kg(fuel)]       | single-aisle [km/kg(fuel)] | wide-body [km/kg(fuel)]      |
|----------------------|----------------------|------------------------------|----------------------------|------------------------------|
| 20000                | 466                  | <del>0.393</del> 0.340±0.070 | 0.252±0.013                | 0.096±0.004                  |
| 25000                | 376                  | <del>0.442</del> 0.450±0.075 | 0.282±0.015                | 0.107±0.004                  |
| 30000                | 301                  | 0.470±0.081                  | 0.287±0.015                | 0.117±0.005                  |
| 35000                | 238                  | 0.488±0.086                  | 0.324±0.018                | <del>0.120</del> 0.116±0.005 |
| 40000                | 188                  | 0.682±0.108                  | 0.401±0.024                | 0.157±0.007                  |

190 leading to on average higher engine loads at lower altitudes than during cruise. The flown distance in Table ?? increases with altitude, as the aircraft is operated in near-fuel-optimal conditions during cruise. On the other hand, larger aircraft tend to have a lower specific range than aircraft with shorter range, as they become less fuel efficient on longer ranges, on which they have to carry additional fuel solely for the purpose of transporting a higher fuel mass over a long distance.

## 2.4 Choice of physical climate metric

195 Physical climate metrics can be understood as methods to directly compare the climate impact-effect of different forcing agents, or different sectors and sources (?). A climate metric is a combination of climate indicator (e.g. average temperature response (ATR) or global warming potential (GWP)), time horizon (e.g. 20, 50 or 100 years) and emission scenario, including emission scenarios and background emission (?). ~~As emission scenarios a pulse, sustained~~ For the time development of aircraft emissions a pulse (emission at a certain time), sustained (emission sustained at a certain time) or a future increasing (emission  
200 continue to develop) scenario might be considered (?). The choice of an adequate climate impact-effect metric depends on the specific question of climate impact-effect (e.g. 'Contribution to nowadays climate impact-effect', 'What is the long-term climate

impact effect?') to be answered (?). Thus, depending on the question different climate impact effect metrics should be used.

The aCCFs were developed based on the climate metric of average temperature response over a time horizon of 20 years (ATR20). The emission scenario assumed was either based on pulse emission (P) or on the future business as usual emission scenario (F). This inconsistency has been discovered and a revision of the aCCFs is given in the recent publication of ?. Now all direct outputs of aCCF formulas are given in P-ATR20 (ATR20 based on pulse emission). ~~As P-ATR20 is not my not be well suited for some questions this climate metric is not well suited. Therefore all questions, e.g. for the question of the climate effect reduction of steadily applying a certain routing strategy future emission scenario are more suitable. Thus~~ we introduced conversion factors  $CM_X(i_{CM})$  (see Eq. 1) which make it possible to switch from the P-ATR20 metric (which is the basis of the aCCF-V1.0 formulas in the Appendix A) to other physical climate metrics, as e.g. ATR based on the future emission scenario (i.e. business as usual) with different time horizons (i.e. F-ATR20, F-ATR50 or F-ATR100). To calculate these conversion factors we use the non-linear climate response model AirClim (??) and perform several simulations with different emission scenarios. A first set of conversion factors for four different metrics ( $i_{CM}$ ) is presented in Table ??. Note, that for the conversion factor the time development of the forcing is important. As we use the impact on an annual basis the time development of O<sub>3</sub> and H<sub>2</sub>O forcing is the same. Therefore, also the conversion factor for O<sub>3</sub> and H<sub>2</sub>O are the same. The conversion factors of PMO and CH<sub>4</sub> are the same, as the time development (and forcing) of PMO is coupled with the time development (and forcing) of CH<sub>4</sub>. Conversion factors for other emission scenarios and other climate indicators will be presented in an upcoming publication by Dahlmann et al., 2022 (in ~~preperation~~preparation).

**Table 3.** Climate metric conversion factors  $CM_x$  from P-ATR20 (pulse emission based ATR over 20 years) to F-ATR20 (future emission based ATR over 20 years), F-ATR50 (future emission based ATR over 50 years) and F-ATR100 (future emission based ATR over 100 years) for water vapour, ozone, methane, primary mode ozone (PMO), contrail-cirrus and CO<sub>2</sub> aCCFs.

|                      | F-ATR20 | F-ATR50 | F-ATR100 |
|----------------------|---------|---------|----------|
| water vapour aCCF    | 14.5    | 34.1    | 58.3     |
| ozone aCCF           | 14.5    | 34.1    | 58.3     |
| methane aCCF         | 10.8    | 42.5    | 98.2     |
| PMO aCCF             | 10.8    | 42.5    | 98.2     |
| contrail aCCF        | 13.6    | 30.16   | 48.9     |
| CO <sub>2</sub> aCCF | 9.4     | 44.0    | 125.0    |

## 220 2.5 Choice of climate forcing related efficacy

Radiative forcing (RF), measured in  $W/m^2$ , describes the change of the planetary energy balance. RF is often used as a metric for comparing the global climate impact effect of specific forcing components (e.g. CO<sub>2</sub>, ozone, aerosols). What makes RF so useful for comparison is its empirical based linear relationship to the steady-state global mean near-surface temperature change

(e.g. ?). The model dependent constant, which relates these two parameters, is the so-called climate sensitivity parameter  $\lambda$  (e.g. 225 ??). This relation is a good approximation for many spatially homogeneously distributed climate forcing components, such as CO<sub>2</sub>. However, for radiatively active gases with a distinctly ~~inhomogeneous structure~~ in-homogeneous structure (vertically and horizontally) like, e.g. ozone ~~and contrails~~ change patterns from precursor emissions of the aviation sectors and contrail-cirrus, the relation with constant climate sensitivity parameter fails (e.g. ??). ~~Several studies showed that the~~ (e.g. ???). Thus, RF of some non-CO<sub>2</sub> forcing agents ~~is~~ may be less or more effective in changing global mean temperature per unit forcing compared 230 to the response of CO<sub>2</sub> forcing. As pointed out by, e.g., ? or ?, this can be explained by the fact that such non-homogeneous forcings trigger feedbacks, that differ from those induced by CO<sub>2</sub> (giving a climate response different from CO<sub>2</sub>). A way to account for this is to introduce a forcing dependent efficacy parameters, which is defined as warming per unit global average forcing divided by the warming per unit forcing from CO<sub>2</sub>. By considering this efficacy (???), a better prediction of the ~~global~~ expected global mean temperature change is given.

235 As mentioned before, aCCFs are based on the climate metric average temperature response (ATR) over a certain time horizon, a useful metric to ~~asses aviation induced climate impact~~ assess aviation-induced climate effect (?). However, here ATR was calculated without taking the efficacy of the different non-CO<sub>2</sub> forcing components into account. Integrating the efficacies  $r_X$  of water vapour, ozone, methane and contrail cirrus to the merged aCCFs (see Eq. 1) ~~makes the prediction of aviation~~ climate impact has the potential to make the predictions of aviation induced temperature change and climate effect more 240 reliable. ~~State-of-the-art efficacies~~ Efficacies were recently summarized in ? and are shown in Table ??. The efficacy of the NO<sub>x</sub> ~~induced~~ induced short term ozone, NO<sub>x</sub> ~~induced methane and~~ induced primary mode ozone PMO ~~induced methane~~ is larger than 1. This means that ozone and methane RF have a higher impact on the temperature response than CO<sub>2</sub>. However, the efficacy values provided by ? may require updates, e.g. other values for ozone efficacies were provided by ?, using a more realistic ozone change pattern from aviation emission. Moreover, ? assume the PMO efficacy to be equal to that for methane, 245 although the PMO change pattern is largely unknown and there are no dedicated PMO climate sensitivity simulations available. For contrails, the efficacy given in ? is lower than 1, meaning that contrail RF has a lower impact on the global temperature response than CO<sub>2</sub>. Note that the contrail efficacy of 0.42 in ? is based on three different contrail efficacy estimates from earlier studies, including an estimate of 0.59 (?), an estimate of 0.31 (?) and an estimate of 0.35 (?). Efficacies strongly deviating for unity (as in case of contrail cirrus) can substantially affect the assessment of mitigation measures (e.g. ?), but it would be 250 desirable to have more model studies on the subject to establish more reliable values.

### 3 Technical implementation of individual and merged aCCFs in the Python Library CLIMaCCF Version 1.0

The generation of individual and merged non-CO<sub>2</sub> aCCFs will be performed by using a user-friendly Library developed with Python, called CLIMaCCF. The scope of CLIMaCCF is to provide individual and merged aCCFs as spatially and temporally resolved information considering meteorology from the actual synoptical situation, the engine/aircraft type, the selected phys- 255 ical climate metric, and the selected version of prototype algorithms in individual aCCFs (i.e. aCCF-V1.0 and aCCF-V1.1; see Section 2.1). In the following, some details on the technical implementation of the Python Library are presented. For a

**Table 4.** Overview of ~~state-of-the-art~~ efficacies  $\tau_{\chi}$  of ~~NO<sub>x</sub> induced~~ induced ozone, methane, PMO, as well as of water vapour and ~~contrails~~ contrail cirrus. Respective references are given in the right side of the table.

|                  | efficacy | Reference |
|------------------|----------|-----------|
| ozone            | 1.37     | ?         |
| methane          | 1.18     | ?         |
| PMO              | 1.18     | ?         |
| H <sub>2</sub> O | 1        | ?         |
| contrail-cirrus  | 0.59     | ?         |
|                  | 0.31     | ?         |
|                  | 0.35     | ?         |
|                  | 0.42*    | ?         |

\* Lee et al. 2021 value is the mean over the values given by ???

more comprehensive documentation, the reader is referred to the CLIMaCCF User Manual that is provided as a Supplement to this paper. Overall, the Python Library consists of three main blocks: input block, processing block, and output block (see schematic workflow in Figure ??). In the input block, the Python Library obtains the weather data (e.g., forecast, reanalysis, etc.) containing the required meteorological input and configurations like climate metric and aircraft/engine class. In the processing block, the individual aCCFs are calculated and merged aCCFs are generated. In the output block the individual and merged aCCFs are stored. In the following we describe these three blocks in more detail.

260

**Figure 1.** Schematic workflow of calculating individual and merged aCCFs using the Python Library CLIMaCCF Version 1.0. The left box describes the input block, the upper right box the processing block and the lower left box the output block.

### 3.1 Input block

265 Within the input block (left box in Fig. ??), the meteorological input data needed to calculate aCCFs are specified by the user. All meteorological input data needed to calculate the individual aCCFs are summarized in Table ?. The current implementation of the Library is compatible and tested with ~~the standard of~~ [several data products of the](#) European Centre for Medium-Range Weather Forecasts (ECMWF) ~~data~~ [\(i.e. reanalysis data ERA 5 and ERA-Interim, forecast\)](#). These user settings include the selections of geographical area, horizontal resolution and several output options (e.g. the output file can include merged aCCFs, individual aCCFs and the input data used). Besides the specification of meteorological input data, users can  
270 select the version of aCCFs they aim to use. These options include aCCF-V1.0, which is the first consistent and complete set of aCCFs (?), aCCF-V1.1, in which the ~~aCCFs-V1~~ [aCCF-V1.0 are scaled by educated guess factors \(?\) is calibrated to the climate response model AirClim \(see ??\)](#). Additionally user-defined scaling factors can be applied to the selected aCCF version. These scaling factors are set to one ~~per~~ [by](#) default, however if a scaling of the aCCFs (to higher or lower values) is ~~wanted~~ [desired](#) (e.g. for sensitivity studies) the user can adopt them accordingly. User settings for the generation of individual and merged aCCFs  
275 can also be selected. Here, the user can choose different assumptions for aircraft specific parameters and the physical climate metric (emission scenario, physical climate indicator, time horizons). Moreover, the user can decide if the aCCF calculation is performed with or without ~~considering~~ [consideration of](#) efficacy. As for efficacy, users can use the values reported by ? or ~~define the factors themselves~~ [use efficacy values provided by other studies](#). As the selection of aircraft ~~type~~ [engine classification](#) is an important factor in determining reliable merged aCCF (see Section ??), we have implemented an initial set of specific  
280 emission indices for some selected aircraft/engine combinations. By selecting an aggregated aircraft/engine type, tabulated flight level dependent NO<sub>x</sub> emission indices and flown distance per burnt fuel values are used to calculate the merged aCCFs. An additional functionality is the identification of areas that are very sensitive to aviation emission, in the following called 'climate hotspots'. To quantify these areas, a threshold value is used to identify the regions with very large effects induced from aviation, ~~has to be chosen~~. The threshold to determine these climate hotspot areas is also considered as an adjustable  
285 parameter (for details, see Section ??). In the end, the users can specify output parameters such as merged aCCFs or the aCCFs of each species. In the case of using ensemble forecasts, one can also receive the ensemble mean and ensemble spread of the resulting individual or merged aCCFs from CLIMaCCF. The user can select the output format (either netCDF, or PICKLE). There is also a possibility to output the climate hotspots in the GeoJSON file format.

### 3.2 Processing block

290 The processing block (upper right box in Fig. ??) performs the aCCF calculations using the given weather data and the above-described user settings. The processing block includes, for the aCCF calculation, preprocessing of input variables, the calculation of individual and merged aCCF, as well as the calculation of climate sensitive regions (climate hotspots). A more detailed description of these calculations is given in the following.

295 Before calculating individual and merged aCCFs, preprocessing of several input data is needed:

**Processing weather data:** In an initial step, based on the user preferences, the geographical areas, where the merged aCCFs are calculated, can be reduced, or the default resolutions can be changed. In these cases, some modifications are applied to the original input weather data. Notice that the horizontal resolution cannot be increased, and the decrease in resolution is a factor  $i$  of natural numbers. For instance, if the resolution of meteorological input data is  $0.25^\circ \times 0.25^\circ$ , the resolution can be reduced  
300 to  $i \cdot 0.25^\circ \times i \cdot 0.25^\circ$ , for  $i \in \mathbb{N}$ .

**Calculate required weather variables form alternative variables:** ~~If some required~~ meteorological variables are missing in the input data set, they can be retrieved from ~~provided default~~ alternative variables included in the data set. However ~~only,~~ , only if alternative variables described in Table ?? exist in the data set, as they will be employed to calculate the required variables.

305 **Tabulated aircraft/engine specific parameters:** In the database of the Library,  $NO_x$  emission indices ( $EI_{NO_x}$ ) and flown distances ( $F_{km}$ ) are provided for different types of aircraft (i.e. regional, single aisle, wide-body) at different flight levels. By using spline interpolations, these indices are calculated for any given flight level (or pressure level).

**Calculate persistent contrail formation areas:** The units of the day- and night-time contrail aCCFs are given in the unit of [K/km], meaning that they are defined only in areas where the formation of persistent contrails is possible, called persistent con-  
310 trail formation areas (PCFA). These regions are identified by two atmospheric conditions (e.g. ?): First the Schmidt-Appleman condition (SAC) (?), ~~using the meteorological variables of relative humidity over ice and temperature~~ that contrails form if the exhaust-air mixture in the expanding plume reaches water-saturation, has to be fulfilled. SAC describes the formation of both short-lived and long-lasting (or persistent) contrails. For the persistence of contrails a second criteria is needed: the ambient air has to be supersaturated with respect to ice, meaning that the relative humidity over ice ( $rhum_{ice}$ ) is higher ~~that than~~ 100%.

315 Within CLIMaCCF the PCFA are calculated in the processing step. Here the user has two possibilities: The first possibility is to calculate PCFA by using the thresholds ~~, one for the temperature (of ice supersaturated regions (ISSR), using the temperature threshold of  $T < 235K$  ) and one for the~~ and the threshold of relative humidity over ice ( $>100\%$ ) ~~(see supplement ?)~~ (PCFA-ISSR). The second possibility, which is more accurate, ~~as it takes into account aircraft/engine properties, is to use SAC is~~ to calculate SAC explicitly to define the ~~thresholds and temperature threshold and then~~ additionally assume ice supersaturation  
320 (PCFA-SAC). Note however, that for the exact calculation of SAC also parameters of aircraft/engine properties are needed.

The **calculation of the individual and merged aCCFs** within CLIMaCCF is based on the aCCF formulas of ? (see Appendix A). By using the provided original and preprocessed input data the individual and merged aCCFs are calculated. Moreover, user specific conversion factors due to the selected physical climate metric, efficacy, and aircraft specific emission indices are needed. Table ?? summarizes all the individual aCCFs and parameters needed to calculate merged aCCFs. Additionally the  
325 processing block includes the **calculation of climate hotspots**, areas that are very sensitive to aviation emission. The calculation of climate hotspots is based on the calculated merged aCCFs. For identifying these climate hotspots a threshold based on the merged aCCFs is needed. This threshold can either be fixed to a user defined parameter or it can be determined dynamically within CLIMaCCF by calculating the percentile value (e.g. 90% or 95%) of the merged aCCF (a more detailed explanation of the dynamical approach is given in Section ??).

**Table 5.** Meteorological variables and their alternatives needed to calculate aCCFs.

| <i>Meteorological variables</i>                                 | <i>Alternatives</i>                                   |
|-----------------------------------------------------------------|-------------------------------------------------------|
| Potential vorticity unit [ $10^{-6} Kkg^{-1} m^2 s^{-1}$ ]      | Temperature [ $K$ ], components of wind [ $ms^{-1}$ ] |
| Relative humidity [%]                                           | Specific humidity [ $kgkg^{-1}$ ]                     |
| Outgoing longwave radiation (OLR) [ $Wm^{-2}$ ]                 | Top net thermal radiation (ttr) [ $Jm^{-2}$ ]         |
| Incoming solar radiation at top of the atmosphere [ $Wm^{-2}$ ] | Date, declination angle                               |
| Temperature [ $K$ ]                                             |                                                       |
| Geopotential [ $m^2 s^{-2}$ ]                                   |                                                       |

### 330 3.3 Output block

In the output block (lower right box in Fig. ??), the processed aCCFs are saved. In the current version, for saving aCCFs (e.g., individual aCCFs, merged aCCF, and climate hotspots) and weather variables (if selected), netCDF and PICKLE file formats can be selected. In addition, the user can choose the GeoJSON format for storing polygons of climate sensitive regions (i.e., climate hotspots).

## 335 4 Application of CLIMaCCF to ERA5 reanalysis data

The Python Library CLIMaCCF allows to easily generate output of spatially and temporal resolved climate ~~impact-effect~~ of aviation emissions by using available aCCFs. As mentioned above the individual aCCFs of ~~NO<sub>x</sub> induced~~ ~~induced~~ ozone and methane, water vapour, contrail-cirrus, and the merged non-CO<sub>2</sub> aCCFs can be calculated with CLIMaCCF. In this ~~Section~~ ~~section~~, we describe different characteristic patterns of individual and merged aCCFs over the European airspace. We ~~here~~ ~~use the aCCFs over the whole European airspace (although they were developed over the NAFC), as weather pattern analysis showed that Europe is highly influenced by North Atlantic dynamics.~~ We also compare merged aCCFs using different assumptions of aircraft types and metrics, and we explain how to identify regions that are very sensitive to aviation emissions (~~so~~ ~~called-so-called~~ climate hotspots) and how these climate hotspots behave.

The meteorological input data, used for calculating the aCCFs within the CLIMaCCF were taken from the ERA5 high resolution realisation reanalysis data set (~~?)~~(~~?~~). ERA5 is the fifth generation of the European Centre for Medium-Range Weather Forecasts (~~ECWMF~~~~ECMWF~~) atmospheric reanalysis. ERA5 high resolution (HRES) data are archived with a horizontal resolution of  $0.28^\circ \times 0.28^\circ$ .

### 4.1 Analysis of individual and merged aCCFs by using the Python Library CLIMaCCF

~~In this subsection~~ ~~As application example~~ we show typical ~~summer~~ patterns of water vapour, NO<sub>x</sub>-induced (including ozone, methane and PMO), contrail-cirrus and merged non-CO<sub>2</sub> aCCFs at 12 UTC (under day-time conditions) on 15 June, 2018, over the geographical region of Europe ( $15^\circ W$ - $30^\circ E$ ,  $35^\circ$ - $60^\circ N$ ) at a pressure level of 250 hPa ~~as an example~~. With this analysis



**Table 6.** The functions and variables needed to calculate merged aCCFs.

| <i>Function</i>         | <i>Unit</i>                  | <i>Physical input parameter</i>                                                      | <i>Range</i>                                                        |
|-------------------------|------------------------------|--------------------------------------------------------------------------------------|---------------------------------------------------------------------|
| $aCCF_{O_3}$            | K/kg(NO <sub>2</sub> )       | Geopotential, temperature                                                            | $\geq 0$ (warming)                                                  |
| $aCCF_{CH_4}$           | K/kg(NO <sub>2</sub> )       | Geopotential, solar radiation                                                        | $\leq 0$ (cooling)                                                  |
| $aCCF_{H_2O}$           | K/kg(fuel)                   | Potential vorticity unit                                                             | $\geq 0$ (warming)                                                  |
| $aCCF_{contrail-day}$   | K/km                         | Outgoing longwave radiation, relative humidity, temperature                          | $-10^{-10} \leq aCCF_{contrail-day} \leq 10^{10}$ (cooling/warming) |
| $aCCF_{contrail-night}$ | K/km                         | Temperature, relative humidity                                                       | $aCCF_{contrail-night} \geq 0$ (warming)                            |
| $EI_{NO_x}$             | g(NO <sub>2</sub> )/kg(fuel) | Aircraft/engine                                                                      | $EI_{NO_x} \geq 0$                                                  |
| $F_{km}$                | km/kg(fuel)                  | Aircraft/engine                                                                      | $F_{km} \geq 0$                                                     |
| PCFA                    | -                            | threshold for relative humidity over ice and temperature, aircraft/engine properties | PCFA = [0, 1]                                                       |

we aim to give an impression of the typical structure and of gradients of the specific aCCFs over the European airspace. Note that in this subsection, we generated individual and merged aCCF using aCCF-V1.1 and by assuming the climate metric of F-ATR20 with inclusion of efficacies. For merging we used typical transatlantic fleet mean parameters (see Section ??). In case of merged aCCFs we will focus on the merged non-CO<sub>2</sub> aCCFs (Eq. 1), as the merged aCCF pattern doesn't change if including the CO<sub>2</sub> aCCF which is as constant value in time and location. But of course, that for ~~climate-optimal~~ climate-optimal trajectory optimization, fuel consumption has to be also taken into account, as this is directly linked to CO<sub>2</sub> emissions.

#### 4.1.1 Water vapor aCCF

Fig. ?? presents the typical water vapour aCCFs over Europe for the specific summer day. As ~~aircraft-induced~~ aircraft-induced water vapour emissions have a warming effect, the water vapour aCCFs reveal positive values in all regions. The values of water vapour aCCF are highly variable, and they vary with locations by a factor of about three. This regional variation in the aCCFs pattern highly follows the weather pattern; the maximum value can be observed over the region with negative geopotential height anomalies (see overlaid green lines), indicating a low ~~precursor~~ pressure and low tropopause.

**Figure 2.** Water vapour aCCF at pressure level of 250 hPa over Europe at 12 UTC on 15 June, 2018. Units are given in [K/kg(fuel)]. Overlaid green lines indicate positive (solid line) and negative (dashed line) geopotential height anomalies (in  $\text{m}^2/\text{s}^2$ ).

#### 4.1.2 ~~NO<sub>x</sub> induced~~-induced aCCFs

365 To better understand the total ~~NO<sub>x</sub> induced~~-induced aCCF, the NO<sub>x</sub> aCCF is displayed in Fig. ?? together with the ozone and methane aCCF. Note that the long-term primary mode ozone PMO, is included here in the methane aCCF. The ozone aCCF (Fig. ??a) is positive (warming), as NO<sub>x</sub> emissions from aviation induce the production of the greenhouse gas ozone. It reveals generally higher values in southern regions, as the photochemical ozone formation increases with the availability of sunlight as well as with temperature. Additionally, the synoptical weather pattern influences the ozone aCCF values, as emitted  
370 NO<sub>x</sub> that is transported to lower latitudes experiences more solar radiation, and thus photochemical ozone production is higher compared to that which remains at higher latitudes. The methane aCCF is negative (Fig. ??b), as NO<sub>x</sub> emissions cause a decrease in methane concentrations, as there is a decrease in warming from methane. The resulting total NO<sub>x</sub> aCCF (Fig. ??c), a combination of ozone warming and methane net cooling effects, reveals that the ozone effect dominates the overall warming effect of NO<sub>x</sub> emissions. Note that by using the metric of ATR20 and an underlying future emission scenario, the differences  
375 in lifetime between NO<sub>x</sub>, ozone and methane are taken into account.

**Figure 3.** (a) Ozone aCCF, (b) methane aCCF (including PMO) and (c) total  $\text{NO}_x$  aCCF (sum of ozone, methane and PMO aCCFs) at pressure level 250 hPa over Europe at 12 UTC on 15 June, 2018. Units are given in  $[\text{K}/\text{kg}(\text{NO}_2)]$ . Overlaid green lines indicate positive (solid line) and negative (dashed line) geopotential height anomalies (in  $\text{m}^2/\text{s}^2$ ).

#### 4.1.3 Contrail-cirrus aCCFs

Only if the atmospheric conditions allow for a contrail formation, the contrail aCCF is non-zero. Fig. ?? shows the day-time contrail-cirrus aCCF that can lead to either a positive or negative climate impacteffect. Whether the climate impact-effect is positive or negative depends mainly on the solar insolation, as contrails not only reduce the outgoing longwave radiation (warming) but also reflect the shortwave incoming radiation (cooling). The spatial variability in the contrail aCCF is very high and ranges from zero (regions with no persistent contrail formation) to high positive or negative values. This is clear as the formation of persistent contrails is highly sensitive to the actual atmospheric conditions.

**Figure 4.** Day-time contrail aCCF at pressure level 250 hPa over Europe at 12 UTC on 15 June, 2018. Units are given in [K/km(contrail)]. Overlaid green lines indicate positive (solid line) and negative (dashed line) geopotential height anomalies (in  $\text{m}^2/\text{s}^2$ ).

#### 4.1.4 Merged non-CO<sub>2</sub> aCCFs

Figure ?? finally shows the merged non-CO<sub>2</sub> aCCF, which combines the water vapour, NO<sub>x</sub>-induced and contrail-cirrus aCCFs. The shown merged aCCF is calculated based on the climate metric of F-ATR20, taking into account the different efficacies of contrails, ozone and methane. Moreover, the typical averaged fleet mean values of transatlantic flights are taken for the NO<sub>x</sub> emission index and the specific range. The comparison of the individual aCCF components (see Figs. 2-4) with the merged non-CO<sub>2</sub> aCCF (Fig. ??) clearly shows that the contrail-cirrus aCCF dominates the non-CO<sub>2</sub> climate **impact-effect** in the regions where contrails form. By converting all the individual aCCFs to the same unit of K/kg(fuel), the direct comparison of the aCCFs can be allowed (see Appendix B, Figure ?? first row). This shows that contrail aCCF have the highest climate **impact-effect** in the contrail formation areas, followed by the NO<sub>x</sub>-induced aCCF; whereas the water vapour aCCF is of negligible magnitude in this case. Thus, adding the high values of positive contrail aCCF to the smaller positive NO<sub>x</sub> aCCF values leads to very high values in the merged aCCF, whereas areas of negative contrail aCCF mostly lead to the negative merged aCCF, as the magnitude of the negative aCCF is often higher than that of the NO<sub>x</sub>-induced aCCF. On the basis of the merged aCCF (Fig. ??), a hypothetical climate-optimized European flight (which will stay on this pressure level for simplification) would certainly try to avoid the areas with high positive merged aCCFs. Further, this flight trajectory will probably find a compromise between avoiding long distances through enhanced climate warming areas and at the same time avoiding long detours as these

would induce a penalty with respect to CO<sub>2</sub> aCCF. Thus, if the trajectory is optimized based on the merged non-CO<sub>2</sub> aCCF, this penalty is not taken into account.

**Figure 5.** Merged non-CO<sub>2</sub> aCCF at pressure level 250 hPa over Europe at 12 UTC on 15 June, 2018. Units are given in [K/kg(fuel)]. Overlaid green lines indicate positive (solid line) and negative (dashed line) geopotential height anomalies (in m<sup>2</sup>/s<sup>2</sup>).

#### 400 4.2 Sensitivity of merged aCCFs to different aircraft/aircraft classes and climate metrics

As mentioned above, the merged aCCFs can be used as advanced MET information for flight planning, as CLIMaCCF enables quantifying the total non-CO<sub>2</sub> climate ~~impact-effect~~ as four-dimensional data set (latitude, longitude, altitude and time), that is necessary for a ~~climate-optimized-climate-optimized~~ trajectory. In Section 4.1, we showed the merged aCCF constructed with CLIMaCCF assuming the climate metric of F-ATR20 (the efficacies included) and the transatlantic fleet mean value of the NO<sub>x</sub> emission index and the specific range. However, as described in Section ??, there are several choices for generating the merged aCCFs. These choices are related to the climate objective (climate metric) and the emission behaviour of the aircraft type and depend of course on a user objective. In the following, we investigate how sensitive the merged non-CO<sub>2</sub> aCCFs are to different assumptions. Table ?? summarizes the different considerations of merged non-CO<sub>2</sub> aCCFs that were performed with CLIMaCCF. The reference calculation is the same as shown in Section 4.1 (using the climate metric F-ATR20, inclusion of efficacies, and emission indices of typical fleet mean values of transatlantic flights). Additionally we conducted three sensitivity calculations with height dependent emission indices and specific ranges of different aircraft types (i.e. regional, single-aisle and wide-body); and one sensitivity calculation with a different climate metric of F-ATR100.

In the first three sensitivity calculations (SENS-AC1, SENS-AC2 and SENS-AC3), we varied the emission indices by using

**Table 7.** Overview on the conducted calculations of merged non-CO<sub>2</sub> aCCFs. Besides the reference calculation (REF), which uses transatlantic fleet mean values, there are three sensitivity calculations using height dependent aircraft/engine parameters (i.e.  $EI_{NO_x}$ ,  $F_{km}$ ) of different aggregated aircraft types (SENS-AC1, SENS-AC2 and SENS-AC3) and one sensitivity calculation using a different climate metric (SENS-M1). Efficacy is ~~is~~ taken into account for all simulations.

|                       | REF        | SENS-AC1 | SENS-AC2     | SENS-AC3  | SENS-M1    |
|-----------------------|------------|----------|--------------|-----------|------------|
| climate metric        | F-ATR20    | F-ATR20  | F-ATR20      | F-ATR20   | F-ATR100   |
| aircraft/engine class | fleet mean | regional | single-aisle | wide-body | fleet mean |

different aircraft types. With choosing different aggregated aircraft types (i.e. regional, single-aisle and wide-body), the re-  
415 spective values of  $F_{km}$  and  $EI_{NO_x}$  were used (see Tables ?? and ??). Note moreover that, in contrast to the mean fleet value  
used for the reference calculation,  $EI_{NO_x}$  and specific range values are flight altitude dependent. These sensitivity calculations  
are used to investigate how the aircraft type influences the overall climate ~~impact~~-effect in terms of the average temperature  
change. Figure ?? shows the merged aCCFs for the reference calculation (REF) and for the aircraft dependent sensitivity cal-  
420 culations (SENS-AC1, SENS-AC2 and SENS-AC3) on 15 June, 2018 at a pressure level of 250 hPa. Additional Figure ?? of  
the Appendix B provides aircraft/engine dependent merged aCCF patterns together with the respective water vapour, NO<sub>x</sub> and  
contrail-cirrus aCCFs, all given in the same unit of K/kg(fuel). Generally, for all aggregated aircraft types, the highest climate  
~~impact~~-effect is found in the areas of contrail formations. Comparing the aircraft type dependent merged aCCFs reveals that  
contrails are more dominant for the regional and single-aisle aircraft types. In the case of regional (SENS-AC1) and single-aisle  
425 (SENS-AC2) aircraft types, the merged aCCFs have very high contrail aCCF values (see Fig. ??), leading to the high absolute  
merged aCCF values. The maximum merged aCCF values are smaller if the transatlantic fleet mean (REF) and the wide-body  
(SENS-AC3) aircraft type emission indices are chosen. Moreover, in regions where no contrails form, the NO<sub>x</sub>-induced aCCF  
(i.e. the sum of the ozone, methane and PMO aCCFs) shows relative high values for REF and SENS-AC3, compared to those  
for SENS-AC1 and SENS-AC2. Comparing to the aircraft/engine dependent NO<sub>x</sub> emission indices and flown distances at  
flight altitude of 35000 ft (roughly corresponding to the pressure layer of 250 hPa) in Tab. ?? and Tab. ??, these differences  
430 can be explained: at this cruise altitude the aggregated regional aircraft type shows the lowest  $EI_{NO_x}$  (7.968 g(NO<sub>2</sub>/kg(fuel)),  
but the highest flown distance values  $F_{km}$  (0.488 km/kg(fuel)).

**Figure 6.** Merged non-CO<sub>2</sub> aCCF at pressure level 250 hPa over Europe on 15th of June 2018 (12 UTC), using four different assumptions for the NO<sub>x</sub> emission index and the flown distance values: (a) typical transatlantic fleet mean, (b) regional aircraft type, (c) single-aisle aircraft type and (d) wide-body aircraft type. Units are all given in [K/kg(fuel)].

To generate a merged non-CO<sub>2</sub> aCCF, it is necessary to choose a consistent climate metric for all individual aCCFs. As mentioned in Section ??, there are many metrics used in literature to assess the climate impaceteffect; however the choice of the metric depends on the objective of the study (e.g. ?). CLIMaCCF provides the possibility to choose between a set of different climate metrics. Thus, we can show how different metrics influence the merged non-CO<sub>2</sub> aCCF. As example we here compare the reference calculation (REF), which is based on F-ATR20 (Fig.??a) to the SENS-M1 calculation, which assumes the climate metric of F-ATR100 (Fig. ??b). For the F-ATR100 metric, the focus lies more on long-term mitigation effects, whereas the choice of F-ATR20 metric focuses on the short-term mitigation effect. Choosing the time horizon of 100 years for the F-ATR

largely impact the absolute values of the merged aCCF, as the metric conversion factor of all species is higher for F-ATR100  
440 (see Tab. ??). Moreover, in Fig. ?? (Appendix B) the individual aCCFs for these two metrics are shown in terms of the same  
unit of K/kg(fuel) and we see that the climate ~~impact~~ effect of NO<sub>x</sub>-induced emissions gets ~~somehow~~ more important compared  
to the contrail aCCFs in case of ATR100.

**Figure 7.** Merged non-CO<sub>2</sub> aCCF at pressure level 250 hPa over Europe at 12 UTC on 15th June, 2018, using two different assumptions for  
the climate metric: (a) F-ATR20 (REF) and (b) F-ATR100 (SENS-M1).

### 4.3 Identification of climate sensitive regions (climate hotspots)

Any trajectory planning tool capable ~~to plan~~ for planning climate-optimized aircraft trajectories (see ?), can use the information  
445 of the location, altitude and time dependent climate ~~impact~~ effect of non-CO<sub>2</sub> emissions and aim to avoid such highly sensitive  
regions by planning for an alternative, climate-optimized or eco-efficient aircraft trajectory. CLIMaCCF offers the possibility  
to identify those regions with large climate ~~impact~~ effect, called climate hotspots. Threshold values, that define these climate  
hotspots, have to be provided. These threshold values are based on the merged non-CO<sub>2</sub> aCCF values: if the merged aCCF



exceeds a certain threshold value of the merged aCCF the region is defined as a climate hotspot. As the merged aCCFs highly vary with season, flight altitude, geographical latitude, day- and night-time condition and synoptic weather situation, these threshold values should be determined dynamically for every time step and flight altitude over a certain geographical region (e.g. European airspace). To do so, we calculate the percentile (e.g. 95% percentile) of the merged aCCF distribution over all grid-points spanning e.g. the European airspace (in our example we use the geographical region of 35°-60°N, 15°W-30°E). This percentile then provides the time step and level dependent threshold of the merged aCCF. As mentioned above, regions are defined as climate hotspots if the corresponding merged aCCF lies above this threshold. Thus, e.g. in case of the 95% percentile the highest 5% of the merged aCCF are declared as climate hotspots. In CLIMaCCF the user has the possibility to select the geographical region over which the percentile of the merged aCCF is calculated as well as the percentage (e.g. 90%, 95%) of the percentile.

Figure ?? illustrates such climate hotspots (in red) over the European airspace for the different cruise altitudes of 200, 250 and 300 hPa exemplary for the 15th June 2018 at 12 UTC. The underlying merged non-CO<sub>2</sub> aCCF used here is based on the REF calculation (see Tab. ?? and Fig. ??). By selecting the 95% percentile for the calculations we get different threshold values for different altitudes:  $2.945e^{-13}$  K/kg(fuel) for 200 hPa,  $3.256e^{-13}$  K/kg(fuel) for 250 hPa and  $2.687e^{-13}$  K/kg(fuel) for 300 hPa. The threshold at 250 hPa has the highest value, meaning that aviation's climate ~~impact~~-effect (in terms of merged non-CO<sub>2</sub> aCCFs) is generally larger here. Comparing the climate hotspot patterns in Figure ?? it is clear that these regions vary a lot for different altitudes.

**Figure 8.** Climate hotspots over the European airspace on the 15th of June 2018 (12 UTC) for the flight altitudes (a) 200 hPa, (b) 250 hPa and (c) 300 hPa. The thresholds are based on the respective (pressure level dependent) 95% percentile of the merged non-CO<sub>2</sub> aCCF.

## 5 Discussion

### 5.1 CLIMaCCF configuration

With the open source Python Library CLIMaCCF we provide a simple and easy to use framework for quantifying the spatially and temporally resolved climate ~~impact~~-effect of aviation emissions by making use of the aCCFs that are published in the studies of ??? and ??. CLIMaCCF is easy to install and to run and it efficiently calculates the individual and merged non-CO<sub>2</sub> aCCFs, taking the actual meteorological situation into account. Merged non-CO<sub>2</sub> aCCFs are generated by combining the individual aCCFs of water vapour, NO<sub>x</sub>- induced ozone and methane and contrail cirrus, by taking assumptions on the technical specification of the engine/aircraft combination (i.e. EI<sub>NO<sub>x</sub></sub> and F<sub>km</sub>), and on an appropriate physical climate metric. With this newly developed Python Library, the user has got the possibility to investigate merged aCCFs for three different aggregated aircraft types (regional, single aisle, wide-body) that provide flight level dependent values of EI<sub>NO<sub>x</sub></sub> and F<sub>km</sub> (for details see Table ?? and ??). This novel feature of calculating merged aCCFs by considering the flight level and aircraft dependent values of EI<sub>NO<sub>x</sub></sub> and F<sub>km</sub>, rather ~~then~~-than using the transatlantic fleet mean values, leads to a better representation of aviation's non-CO<sub>2</sub> climate ~~impact~~effect. Compared to the study of ?, which showed aviation's merged climate ~~impact~~-effect (in terms of CCFs) by using transatlantic fleet mean values, this is a real improvement, as merged aCCFs vary significantly for different aircraft types as also shown in Fig. ??.

Moreover CLIMaCCF offers the possibility to calculate aCCFs for a set of different physical climate metrics. For instance the user has the flexibility to calculate the aCCFs for the climate metric of global average temperature response (ATR) with pulse emission or future emission scenario over the time horizons of 20, 50 and 100 years. However we want to point out here, that any optimization study has to carefully choose an adequate physical climate metric (i.e. its climate indicator, emission scenario and time horizon), so that it is suitable to the specific application, that depends on ~~taken strategic decisions~~-strategic decisions taken, on given constraints and on policy assumptions (e.g. ??). For example a pulse emission compares the future climate ~~impact~~-effect in a given year, whereas a future emission scenario compares the effect of increasing emissions over a future time period. This leads to different estimates of the ATR, as also shown in Fig. ??.

490

### 5.2 Threshold of relative humidity for ice supersaturated regions (ISSR)

Besides the wise selection of an appropriate climate metric, also other configuration parameters have to be chosen carefully by the user. Thus, if using the Python Library CLIMaCCF for calculating the climate ~~impact~~-effect of contrails the user has to pay special attention when defining the threshold of relative humidity for ice supersaturated regions (ISSR). In case of contrail aCCFs we need to determine these ISSRs, as only in these regions persistent contrails can form. And only for these regions the contrail aCCF is calculated. These ISSRs are identified by two conditions. The temperature is below 235 K (in order to avoid identification of mixed-phase regions (?)) and the relative humidity with respect to ice (RH<sub>ice</sub>) exceeds 100% (see e.g. ?, their supplement on contrail aCCF). However, for considering the sub-grid-scale variability in the relative humidity field in numerical weather forecast model data, e.g. ERA5, RH<sub>ice</sub> thresholds below 100% are needed. For example ? showed that the

500 relatively coarse resolution of the ERA-Interim data, leads to a grid box with a grid mean humidity slightly below 100%, as it is likely within this grid box that some air parcels show relative humidity values above 100%. In the following we explain how we derive the threshold value of  $RH_{ice}$  in order to consider the sub-grid-scale variability for the data product ERA5 HRES (see Section ??). To do so we calculated the annual mean (2009-2010) ISSR frequency over the European region (5°W-30°E, 40°N-60°N) using the ERA-5 data set. For the ISSR frequency calculation we varied the threshold value of  $RH_{ice}$  (i.e. 505 taking 90% and 95%), but leaving the temperature threshold of 235 K constant and compared the results to the observational based ISSR frequency values of the study of ?. This study used in-situ measurement data of temperature and  $RH_{ice}$  from the full MOZAIC program<sup>1</sup> over the period 1995-2010. Table ?? summarises the results of our ERA-5 based ISSR calculations together with the results of ? obtained by observational data. The frequency of ISSR in the European area is shown for three different vertical levels, the tropopause layer (TPL, thermal tropopause), the upper troposphere (UT, 30 hPa below thermal 510 tropopause), and the lower stratosphere (LS, 30 hPa above thermal tropopause). From this table we see that by setting the  $RH_{ice}$  threshold value to 90% for ERA5 the ISSR values of ? are best matched. Thus, taking  $RH_{ice}$  threshold values of 90% the ISSR frequency of ? is only slightly overestimated in the TPL ( 2%) and in the UT ( 1%). Note, that the threshold value for the  $RH_{ice}$  have to be adopted if using other resolutions of ERA-5 data or other data products. The contrail aCCF shown in Section ?? of this publication uses the 90% threshold, as it is based on ERA-5 HRES input data.

**Table 8.** Frequency/Coverage area of annual mean ISSR (in %) over the European region (5°W- 30°E, 40°N-60°N) at the TPL, LS (30 hPa above thermal tropopause), UT (30 hPa below thermal tropopause). Values are shown for MOZAIC in-situ measurement data ? and for ERA-5 HRES using  $RH_{ice}$  thresholds of 90% and 95%,

|                | ?      | $RH_{ice}=90\%$ | $RH_{ice}=95\%$ |
|----------------|--------|-----------------|-----------------|
| TPL            | 18.8%  | 20.55%          | 16.7%           |
| LS(TPL-30 hPa) | 1.6%   | 0.65%           | 0.4%            |
| UT(TPL+30 hPa) | 30.95% | 31.85           | 26.75%          |

### 515 5.3 Limitations of prototype aCCFs

It is also essential to note here that CLIMaCCF is facing limitations. An important limitation is the prototype character of the aCCFs. As described in Section ?? the aCCF algorithms were developed based on a set of detailed comprehensive climate model simulations for meteorological summer and winter conditions with focus on the North Atlantic flight corridor (??). We do not recommend an off-design use of these aCCFs, especially using the aCCFs for tropical regions or for spring and autumn 520 seasons. However the development of the aCCFs is current research activity and an expansion of their geographic scope and seasonal representation is ongoing. New developments and improved understanding in aCCF algorithms will provide updated aCCF formulas that will be included to future versions of CLIMaCCF, as soon as they are published. As the current version

<sup>1</sup>The MOZAIC (Measurement of Ozone, Water Vapour, Carbon Monoxide and Nitrogen Oxides by Airbus In-Service Aircraft) program was designed to collect trace gases by using automatic equipment installed on board of five long-range Airbus A340 operated by European airlines. See ?

of CLIMaCCF provides the possibility to choose between different aCCF versions, it will be easy to implement further aCCF versions.

525 Moreover aCCFs are associated with different aspects of uncertainties, as current scientific understanding still recognizes uncertainties in the quantitative estimates of weather forecast and climate [impact-effect](#) prediction. The uncertainty range of the individual aviation climate effects was recently specified in [\(see confidence interval of the RF estimates in their figure 3\)](#). They showed that still large uncertainties of individual non-CO<sub>2</sub> ~~effects-effect~~ (i.e. contrail-cirrus, NO<sub>x</sub>, water vapour as well as the indirect aerosol effect) estimates exist. Within the EU project FlyATM4E<sub>2</sub>, a concept is developed that incorporates these

530 uncertainties in order to generate robust aCCFs ~~(?)(?)~~. Thus for this purpose ~~educated-guess-estimates-of-aCCF-were-developed~~ (~~aCCF-V1.1~~, ~~?)~~ ~~were developed (??)~~ in order to ~~shift the aCCFs quantity to calibrate the individual aCCF quantities to the state-of-the-art research. These educated-guess aCCF are climate response model AirClim. The option to choose aCCF-V1.1 is~~ included in CLIMaCCF and can be selected in the configuration script. A more detailed description on ~~these educated-guess aCCFs, that are basically aCCFs that are multiplied with educated-guess factors, aCCF-V1.1~~ is given in ~~???~~. Besides choosing

535 between two different aCCF versions (i.e aCCF-V1.0, aCCF-V1.1), the individual aCCFs (either Version 1.0 or Version 1.1) can be modified by multiplied by any factors specified by the user. By using these alternative factors the user has the possibility to generate upper and lower limit estimates of the aCCF. With that the different degrees of level of scientific understanding can be reflected.

#### 540 5.4 Application using ERA5 reanalysis data

CLIMaCCF was successfully applied to ERA5 HRES reanalysis data. Obtained results show the characteristic patterns of the individual and merged aCCFs for a single day in June 2018 over the European airspace. The aCCFs patterns of the individual aCCFs show the overall positive climate [impact-effect](#) of NO<sub>x</sub> and water vapour emissions and negative and positive values for the daytime contrail aCCFs. These features were found in several studies before (e.g. ~~???~~). Looking at the merged aCCFs

545 it is clear, that NO<sub>x</sub> and contrail aCCF are dominating the magnitude of merged aCCFs, while water vapour aCCF only plays a minor role for the total non-CO<sub>2</sub> aCCF. Overall the merged aCCF pattern is highly dominated by the very variable contrail aCCF pattern and thus avoiding the contrail climate [impact-effect](#) leads to the most promising mitigation potential. This is in line with earlier studies, that also showed the dominating effect of contrail-cirrus (e.g. ~~???~~).

[Applying CLIMaCCF to other data sets than ERA5 HRES can influence the aCCF patterns in magnitude and granularity. This depends on how the meteorological input data and also their vertical and horizontal resolution differ from the ERA5 HRES data set used in this study.](#)

550

## 6 Conclusions

In this publication we developed a tool for efficiently calculating the spatially and temporally resolved climate [impact-effect](#) of aviation emission by making use of the aCCFs. In the novel Python Library CLIMaCCF, these aCCFs can be simply calcu-

555 lated with meteorological input data from the forecast or reanalysis data products of ECWMF. Besides the individual aCCFs of water vapour, nitrogen oxide ( $\text{NO}_x$ ) induced ozone and methane and contrail-cirrus aCCF, CLIMaCCF generates merged (non- $\text{CO}_2$ ) aCCFs that combine the individual spatially and temporally resolved aCCFs. However, these merged aCCFs can be only constructed with the technical specification of the  $\text{EI}_{\text{NO}_x}$  and  $F_{km}$  of a selected engine/aircraft type. Additionally, these merged aCCFs can be calculated for a range of user-defined parameters, as e.g. the choice of a physical climate metric. Thus, 560 generating user defined merged non- $\text{CO}_2$  aCCFs can serve as advanced MET info for trajectory flight planning. Additionally CLIMaCCF provides a method to identify regions that are very sensitive to aviation emissions.

We apply CLIMaCCF to the ERA5 HRES reanalysis data set and show the characteristic pattern of the individual and merged aCCFs for a single day in June 2018 over the European airspace. Our results describe the geographical distributions of individual and merged non- $\text{CO}_2$  aCCFs. By comparing the individual aCCFs to the merged aCCF shows that contrail aCCFs are 565 dominating the total non- $\text{CO}_2$  ~~impac~~effect. These merged aCCFs were calculated for different aircraft/engine combinations and with different metrics, showing that magnitude and structure of merged aCCFs vary with different assumption for aircraft/engine combination or for climate metric.

Current limitations of CLIMaCCF could be addressed in future development. Overall future efforts should be directed towards improvement of aCCFs and expansion of user configuration parameters. ~~Thus~~ At the moment CLIMaCCF is designed for 570 ECMWF data, thus possible future extensions of CLIMaCCF could for example include the adaption ~~of the source code to~~ other data products (~~rather than only ECWMF data products~~), as e.g. climate chemistry model data or other numerical weather forecast data. This would be possible by simply adopting the source code of the Library. Additionally future versions of CLIMaCCF could include metric conversion factors for a larger set of climate metrics, as e.g. greenhouse warming potential. Also an expansion of the emission indices to further engine/aircraft combinations or to future aircraft types is possible. 575 Thus overall, with CLIMaCCF we provide a user friendly tool, that can be used for ~~climate-optimized~~ climate-optimized trajectory planning.

*Code availability.* CLIMaCCF is a newly developed open source Python Library. It is developed at <https://github.com/dlr-pa/climaccf/> and is available via the DOI (<https://doi.org/10.5281/zenodo.6977272>). It is distributed under the GNU Lesser General Public Licence (Version 3.0). The respective User Manual, which includes details on the software and its user configuration is included as supplement of this paper.

580 *Data availability.* The ERA5 data sets used in this study can be freely accessed from the respective repositories after registration. ERA5 data were retrieved from the Copernicus Climate Data Store (<https://cds.climate.copernicus.eu/>, European Reanalysis 5, 2020). Last access:05/2022.

## Appendix A: Mathematical formulation of aCCFs-V1.0

A detailed explanation of the aCCFs approach can be found in ? for  $\text{NO}_x$  ~~induced~~-induced species and water vapour, and in 585 the case of the contrail aCCFs approach, a detailed description is given in (?). In the following we describe the mathematical formulation of the individual aCCFs (aCCF-V1.0, see ?). We want to mention here that the aCCF-V1.0 (?) are not identically to ?, but differ by certain factors (explanation is given in ?). Note moreover that all aCCF formulations are consistently given in P-ATR20, and efficacy is excluded.

### $\text{NO}_x$ ~~induced~~-induced aCCFs

590 The total  $\text{NO}_x$  aCCFs is a combined effect of the  $\text{NO}_x$  ~~induced~~-induced ozone aCCFs and the  $\text{NO}_x$  ~~induced~~-induced methane aCCFs. This can be explained by the fact that the  $\text{NO}_x$  emissions of aviation lead to the formation of ozone ( $\text{O}_3$ ) which induces a warming of the atmosphere. Additionally,  $\text{NO}_x$  emissions lead to the destruction of the long lived GHG methane ( $\text{CH}_4$ ) which then induces a cooling of the atmosphere. In the following, the mathematical formulation of both the ozone and the methane aCCFs are described.

### 595 $\text{NO}_x$ ~~induced~~-induced ozone aCCFs

The mathematical formulation of the ozone aCCFs is based on temperature  $T$  [K] and geopotential  $\Phi$  [ $m^2/s^2$ ]. The Note here, that although the solar incoming radiation highly influences ozone production, the meteorological parameters  $T$  and  $\Phi$  turned out to give the best correlations (see table 3 in ?). Thus, the relation for the ozone aCCFs ( $aCCF_{O_3}$ ) at a specific atmospheric location and time is given in temperature change per emitted  $\text{NO}_2$  emission [K/kg( $\text{NO}_2$ )]:

$$600 \quad aCCF_{O_3} = \begin{cases} -2.64 * 10^{-11} + 1.17 * 10^{-13} * T + 2.46 * 10^{-16} * \Phi - 1.04 * 10^{-18} * T * \Phi, & \text{if } aCCF_{O_3} \geq 0. \\ 0, & \text{if } aCCF_{O_3} < 0 \end{cases} \quad (A1)$$

Accordingly, the ozone aCCFs takes positive values, and is set to 0 in case of negative aCCF values.

### $\text{NO}_x$ ~~induced~~-induced methane aCCFs

The methane aCCFs is based on the geopotential  $\Phi$  [ $m^2/s^2$ ] and the incoming solar radiation at the top of the atmosphere  $F_{in}$  [ $W/m^2$ ]. The relation of the methane aCCFs ( $aCCF_{CH_4}$ ) at a specific location and time is given in temperature change per 605 emitted  $\text{NO}_2$  emission[K/kg( $\text{NO}_2$ )]:

$$aCCF_{CH_4}(\Phi, F_{in}) = \begin{cases} -4.84 * 10^{-13} + 9.79 * 10^{-19} * \Phi - 3.11 * 10^{-16} * F_{in} + 3.01 * 10^{-21} * \Phi * F_{in}, & \text{if } aCCF_{CH_4} < 0 \\ 0, & \text{if } aCCF_{CH_4} > 0 \end{cases} \quad (A2)$$

Thus, the methane aCCFs is negatively defined. It is set to 0 if the term  $aCCF_{CH_4}$  is 0 or positive.  $F_{in}$  is defined as incoming solar radiation at the top of the atmosphere as a maximum value over all longitudes and is calculated by:  $F_{in} = S * \cos\theta$ , with total solar irradiance  $S=1360 \text{ W m}^{-2}$ ,  $\cos\theta = \sin(\phi)\sin(d) + \cos(\phi)\cos(d)$  and  $d = -23.44^\circ * \cos(360^\circ/365 * (N + 10))$ . Here  $\theta$  is the solar zenith angle,  $\phi$  is latitude, and  $d$  is the declination angle, which defines the time of year via the day of the year  $N$ .

The mathematical formulation of the ozone aCCF is only valid for the short-term ozone effect of  $\text{NO}_x$ . The primary mode ozone (PMO), which describes the long-term decrease in the background ozone, as result of a methane decrease, is not included (?). Also, the stratospheric water vapour decrease via the methane oxidation is not included. Thus, if merging total  $\text{NO}_x$  effect be aware that only the  $\text{NO}_x$  effect on short term ozone increase and on methane decrease is taken into account. For  $\text{NO}_x$  ~~induced~~ ~~PMO climate impact~~ induced PMO climate effect we have the possibility to include it to the total  $\text{NO}_x$  aCCF, as the PMO aCCF can be derived by applying a constant factor of 0.29 to the methane aCCF (?). Thus  $aCCF_{PMO} = 0.29 * aCCF_{CH_4}$ .

### Water vapour aCCFs

The water vapour aCCFs is based on the Potential Vorticity (PV) given in standard PV units [ $10^{-6} Kkg^{-1}m^2s^{-1}$ ]. Following the relation of the water vapour aCCFs ( $aCCF_{H_2O}$ ) at a specific location and time is given in temperature change per fuel  
615 [K/kg(fuel)]:

$$aCCF_{H_2O}(PV) = 2.11 * 10^{-16} + 7.70 * 10^{-17} * |PV| \quad (A3)$$

The absolute value of the PV is taken to enable a calculation on the southern hemisphere, where PV has a negative sign.

### Contrail aCCFs

The algorithm that generates contrail aCCFs is obtained by the calculation of the contrail radiative forcing, using ERA-Interim data as input (?). In contrast, the above described  $\text{NO}_x$

The RF of day-time contrails (RF

The RF of day-time contrails ( $RF_{aCCF-day}$  in [ $W/m^2$ ]) is based on the outgoing longwave radiation (OLR) at top of the  
620 atmosphere in [ $W/m^2$ ] at the time and location of the contrail formation. For a specific atmospheric location and time, the  $RF_{aCCF-day}$  is given by:

$$RF_{aCCF-day}(OLR) = 10^{-10} * (-1.7 - 0.0088 * OLR) \quad (A4)$$

According to the equation, the RF for the daytime contrails can take positive and negative values, depending on the OLR. The RF of night-time contrails ( $RF_{aCCF-night}$ ) in [ $W/m^2$ ] is based on temperature (T) in [K]. For an atmospheric location  
625 (x,y,z) at time t:

$$RF_{aCCF-night}(T) = 10^{-10} * (0.0073 * 10^{0.0107*T} - 1.03) \quad (A5)$$

For temperatures less than 201 K, the night-time contrail is set to zero. The above calculated RF of contrails can be converted to global temperature change (P-ATR20) by multiplying with a constant factor of  $0.0151 K/(W/m^2)$  (?). The resulting contrail aCCFs are then given in temperature change per flown kilometre [K/km].

630 Contrail aCCFs are only relevant at locations where persistent contrails can form and accordingly regions without persistent contrails have to be set to zero. For that locations in which persistent contrails can form have to be calculated. Persistent contrails can be identified by two conditions: temperature below 235 K and relative humidity with respect to ice at or above 100 % (see supplement of ?). Alternatively, the more accurate Schmidt-Appleman-criterion (?), which additionally considers the aircraft engine type, could be used.
